# Supplementary figures and images for: Irreversible adsorption of acidic, basic, and water gas molecules on calcium-deficient hydroxyapatite
Source: Royal Society of Chemistry journal article supplement (doi:10.1039/c9dt03704g), 2019-01-01

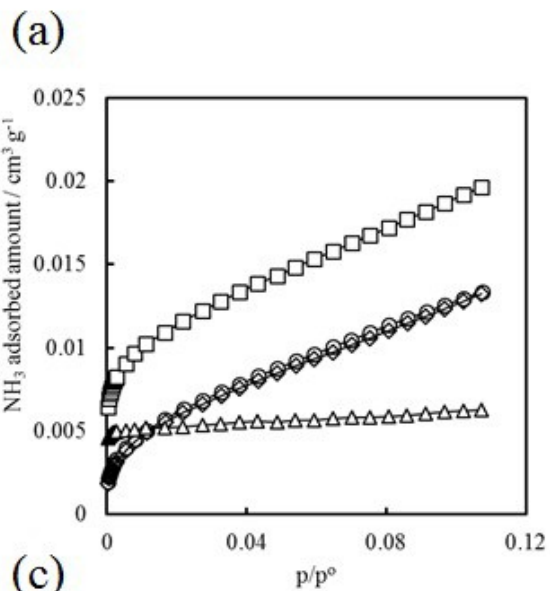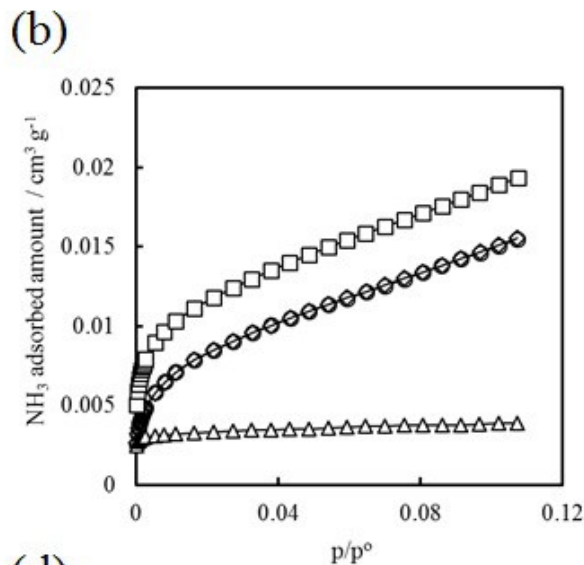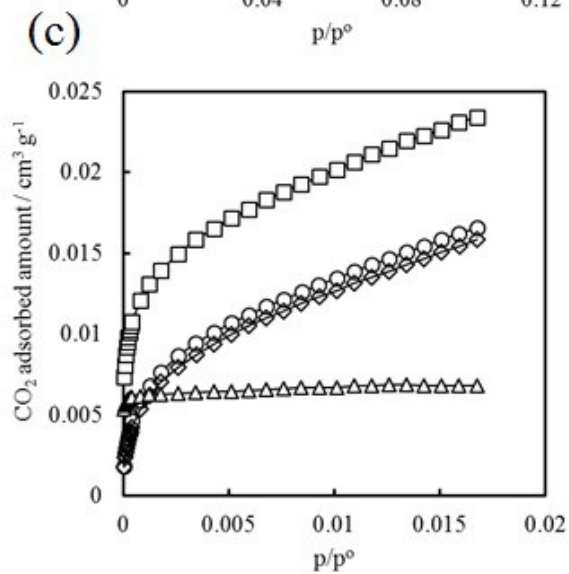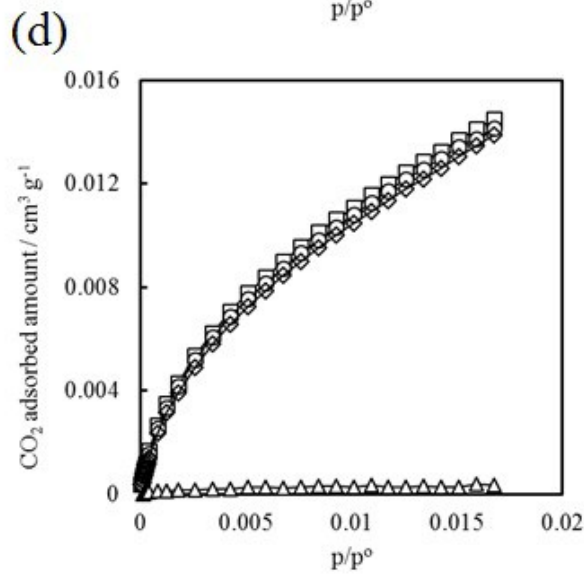

Supplement: c9dt03704g2.pdf [file c9dt03704g2.pdf]

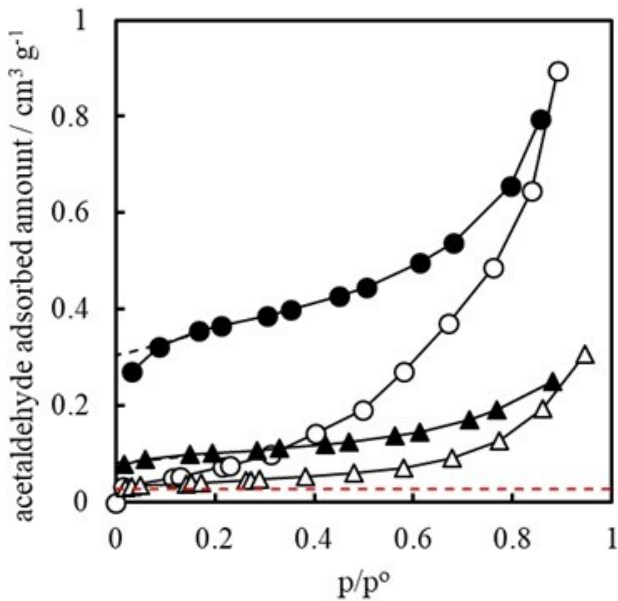

Supplement: c9dt03704g3.pdf [file c9dt03704g3.pdf]

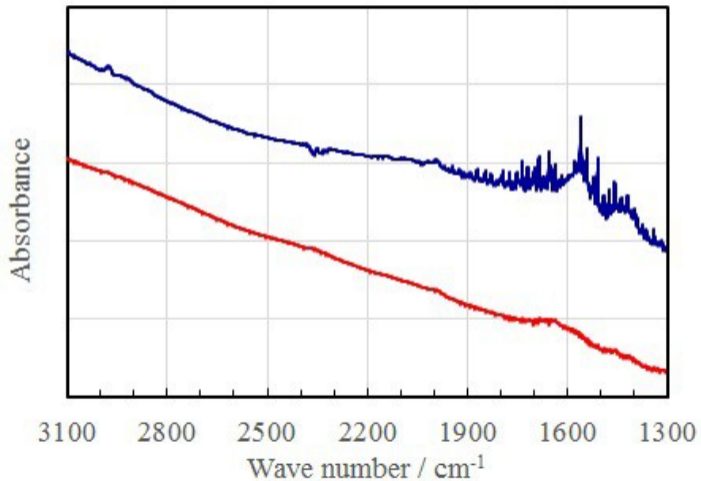

Supplement: c9dt03704g4.pdf [file c9dt03704g4.pdf]
